# Supplementary material for: Genetic diversity and population structure assessed by SSR and SNP markers in a large germplasm collection of grape
Source: Springer Nature journal article supplement (doi:10.1186/1471-2229-13-39), 2013-03-07
Supplement: 12870_2012_1248_MOESM13_ESM.pdf [file 12870_2012_1248_MOESM13_ESM.pdf]

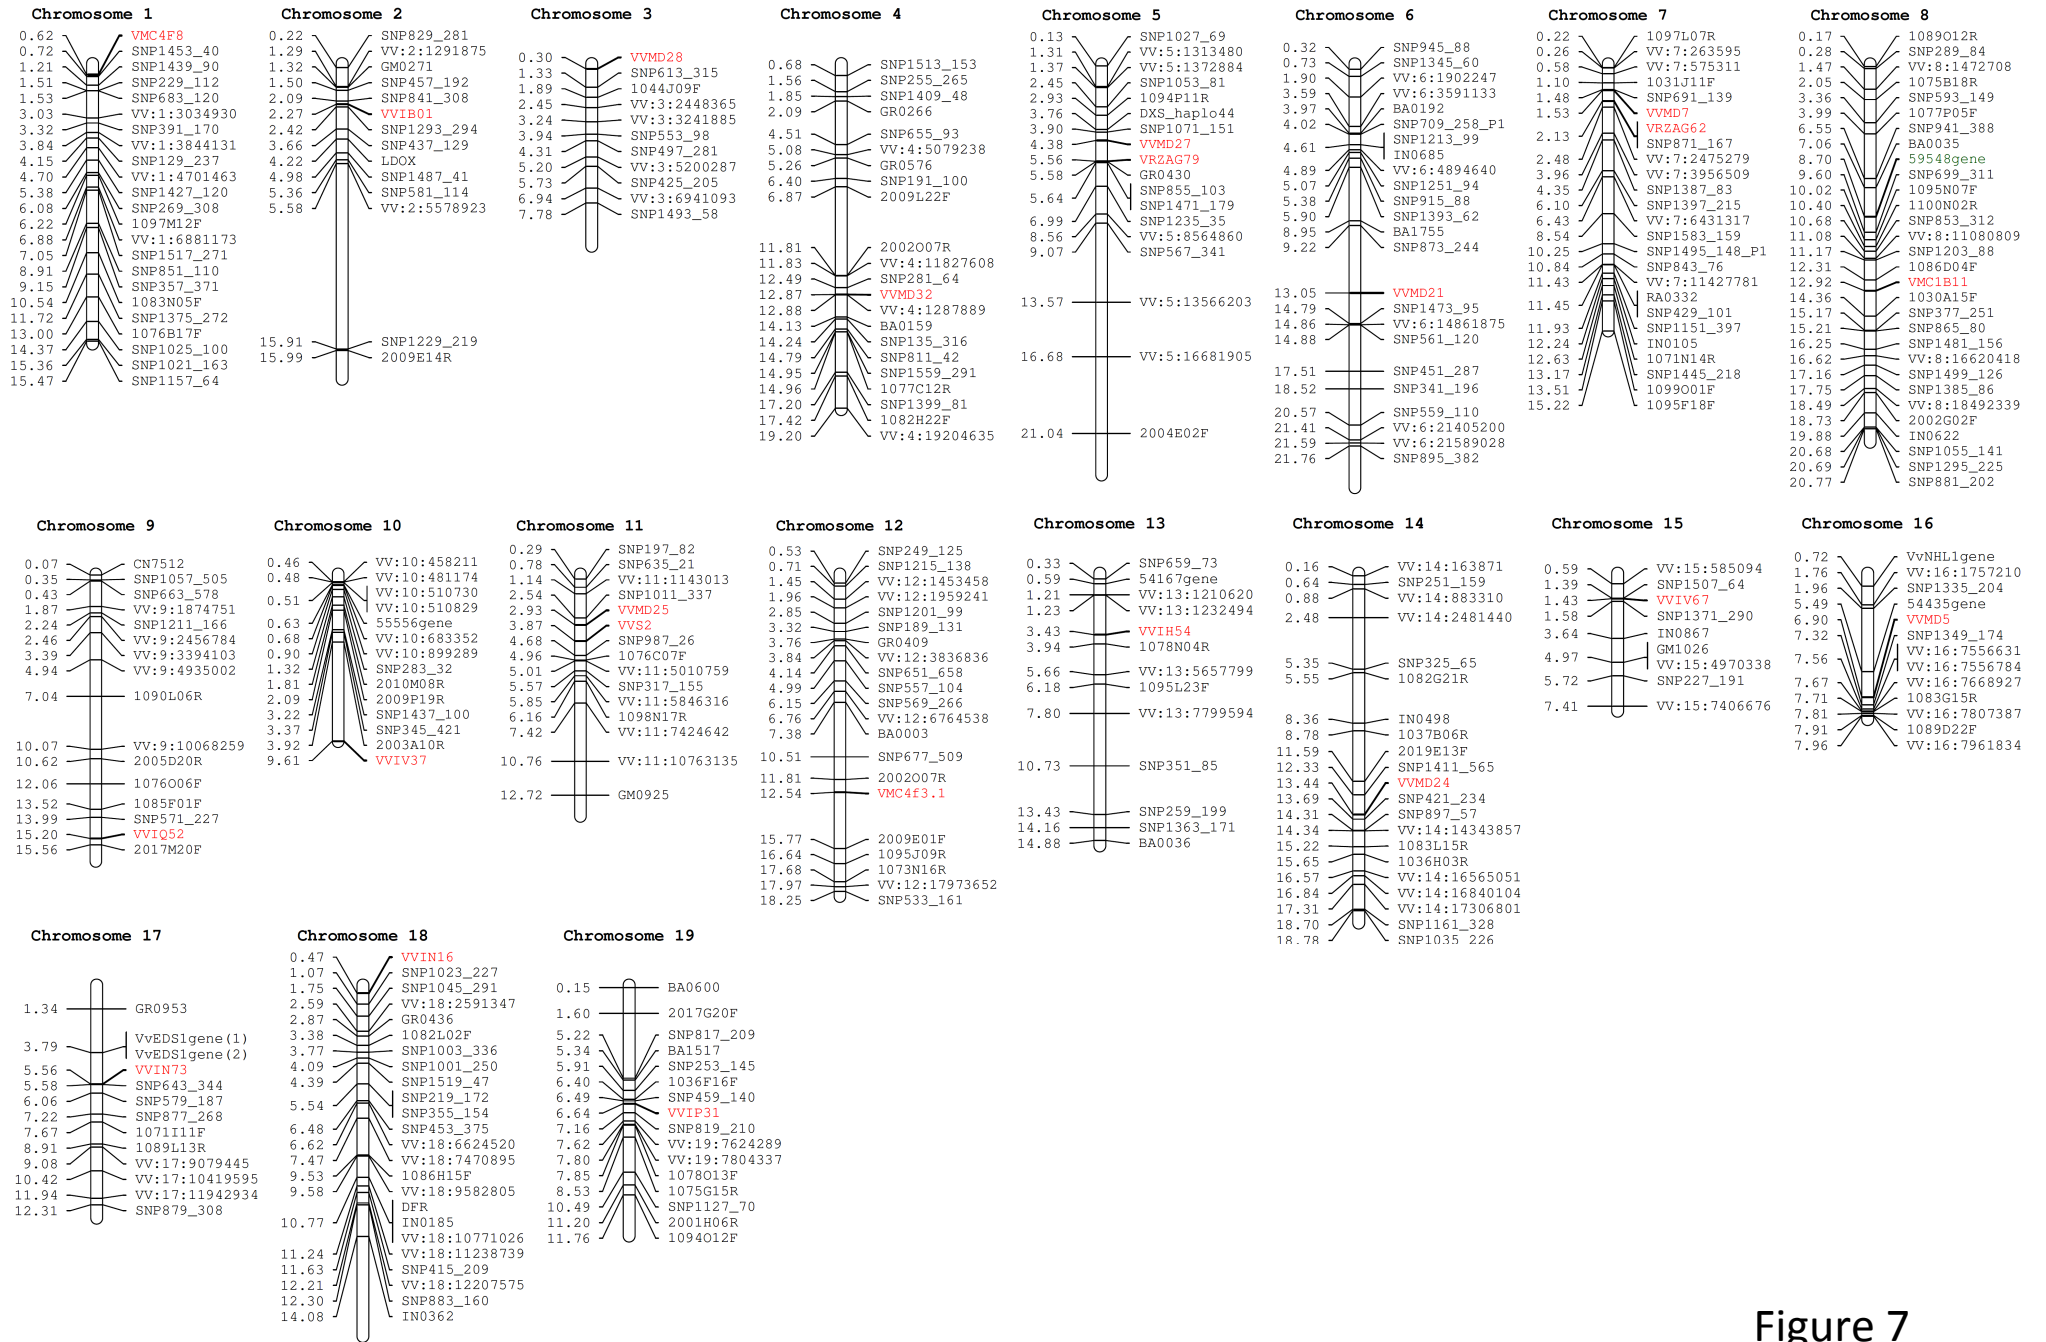

Figure 7
